# Supplementary material
Source: Research Square preprint supplement (doi:10.21203/rs.3.rs-9997134/v1)
Supplement: Supplementary file 1 [file ed53939bb11d29e4efd61001.docx]

**Supplementary Materials**

**Table S1.** Best, Worst, and consistency values of the expert panel for green hydrogen

| Expert | Best criterion | Worst criterion | Consistency |
| --- | --- | --- | --- |
| E1 | Levelized cost of H₂, LCOH | Distance to protected areas | 0.0593 |
| E2 | Levelized cost of H₂, LCOH | Distance to settlements and Indigenous territories | 0.1319 |
| E3 | Levelized cost of H₂, LCOH | Distance to innovation clusters | 0.1298 |
| E4 | Renewable resource potential | Distance to innovation clusters | 0.0949 |
| E5 | Levelized cost of H₂, LCOH | Distance to innovation clusters | 0.0723 |
| E6 | Proximity to existing infrastructure | Hydrogen potential from biomass | 0.0517 |
| E7 | Alignment with public policies | Distance to settlements and Indigenous territories | 0.1524 |
| E8 | Electro-renewable hydrogen potential | Hydrogen potential from biomass | 0.1192 |
| E9 | Electro-renewable hydrogen potential | Hydrogen potential from biomass | 0.1251 |
| E10 | Hydrogen potential from biomass | Freshwater availability and water stress index | 0.1322 |
| E11 | Academic and scientific support | Distance to protected areas | 0.1692 |
| E12 | Renewable resource potential | Distance to innovation clusters | 0.0748 |
| E13 | TRL and performance | Distance to innovation clusters | 0.1005 |
| E14 | Renewable resource potential | Distance to innovation clusters | 0.0980 |
| E15 | Levelized cost of H₂, LCOH | Distance to innovation clusters | 0.0950 |
| E16 | Renewable resource potential | Distance to innovation clusters | 0.0870 |

**Note:** BWM = Best-Worst Method; TRL = technology readiness level; LCOH = levelized cost of hydrogen. The consistency value corresponds to the maximum deviation obtained in the BWM optimization model for each expert.

**Table S2.** Individual BWM weights for green hydrogen criteria

| Criterion | E1 | E2 | E3 | E4 | E5 | E6 | E7 | E8 | E9 | E10 | E11 | E12 | E13 | E14 | E15 | E16 |
| --- | --- | --- | --- | --- | --- | --- | --- | --- | --- | --- | --- | --- | --- | --- | --- | --- |
| Renewable resource potential | 0.032 | 0.066 | 0.042 | 0.190 | 0.063 | 0.031 | 0.046 | 0.043 | 0.043 | 0.059 | 0.046 | 0.218 | 0.048 | 0.196 | 0.063 | 0.174 |
| Electro-renewable hydrogen potential | 0.045 | 0.026 | 0.033 | 0.063 | 0.051 | 0.031 | 0.059 | 0.268 | 0.292 | 0.059 | 0.059 | 0.073 | 0.048 | 0.098 | 0.063 | 0.058 |
| Hydrogen potential from biomass | 0.032 | 0.015 | 0.059 | 0.063 | 0.036 | 0.016 | 0.059 | 0.019 | 0.013 | 0.294 | 0.046 | 0.073 | 0.096 | 0.028 | 0.048 | 0.029 |
| Connection infrastructure | 0.045 | 0.026 | 0.042 | 0.095 | 0.127 | 0.107 | 0.046 | 0.065 | 0.054 | 0.074 | 0.059 | 0.098 | 0.032 | 0.039 | 0.063 | 0.035 |
| TRL and performance | 0.111 | 0.044 | 0.042 | 0.095 | 0.063 | 0.036 | 0.059 | 0.055 | 0.062 | 0.059 | 0.046 | 0.098 | 0.288 | 0.049 | 0.038 | 0.035 |
| Levelized cost of H₂, LCOH | 0.163 | 0.198 | 0.166 | 0.095 | 0.181 | 0.107 | 0.059 | 0.049 | 0.062 | 0.042 | 0.046 | 0.049 | 0.041 | 0.065 | 0.190 | 0.087 |
| Proximity to existing infrastructure | 0.074 | 0.066 | 0.059 | 0.063 | 0.084 | 0.214 | 0.046 | 0.055 | 0.072 | 0.147 | 0.059 | 0.033 | 0.032 | 0.033 | 0.048 | 0.044 |
| Distance to protected areas | 0.015 | 0.015 | 0.059 | 0.027 | 0.036 | 0.053 | 0.046 | 0.055 | 0.086 | 0.033 | 0.024 | 0.042 | 0.096 | 0.039 | 0.032 | 0.058 |
| Freshwater availability and water stress index | 0.074 | 0.026 | 0.042 | 0.063 | 0.084 | 0.053 | 0.059 | 0.049 | 0.037 | 0.015 | 0.046 | 0.037 | 0.041 | 0.065 | 0.095 | 0.058 |
| Distance to settlements and Indigenous territories | 0.045 | 0.021 | 0.099 | 0.063 | 0.032 | 0.053 | 0.015 | 0.049 | 0.086 | 0.074 | 0.137 | 0.042 | 0.058 | 0.049 | 0.032 | 0.058 |
| Distance to sensitive ecosystems | 0.045 | 0.015 | 0.042 | 0.048 | 0.032 | 0.053 | 0.046 | 0.043 | 0.086 | 0.033 | 0.059 | 0.073 | 0.058 | 0.039 | 0.048 | 0.058 |
| Academic and scientific support | 0.074 | 0.066 | 0.099 | 0.063 | 0.063 | 0.043 | 0.046 | 0.049 | 0.062 | 0.033 | 0.241 | 0.059 | 0.048 | 0.028 | 0.038 | 0.029 |
| Regulations and incentives | 0.032 | 0.044 | 0.099 | 0.095 | 0.084 | 0.107 | 0.059 | 0.055 | 0.062 | 0.042 | 0.046 | 0.033 | 0.048 | 0.033 | 0.048 | 0.044 |
| Distance to innovation clusters | 0.104 | 0.044 | 0.018 | 0.032 | 0.014 | 0.043 | 0.091 | 0.055 | 0.062 | 0.029 | 0.046 | 0.016 | 0.015 | 0.022 | 0.021 | 0.018 |
| Alignment with public policies | 0.111 | 0.026 | 0.099 | 0.095 | 0.051 | 0.107 | 0.261 | 0.049 | 0.062 | 0.009 | 0.046 | 0.059 | 0.048 | 0.033 | 0.048 | 0.058 |

**Note:** The values correspond to the individual criterion weights obtained from the BWM optimization for each expert. The normalized group weights derived from these individual vectors are reported in the main manuscript.


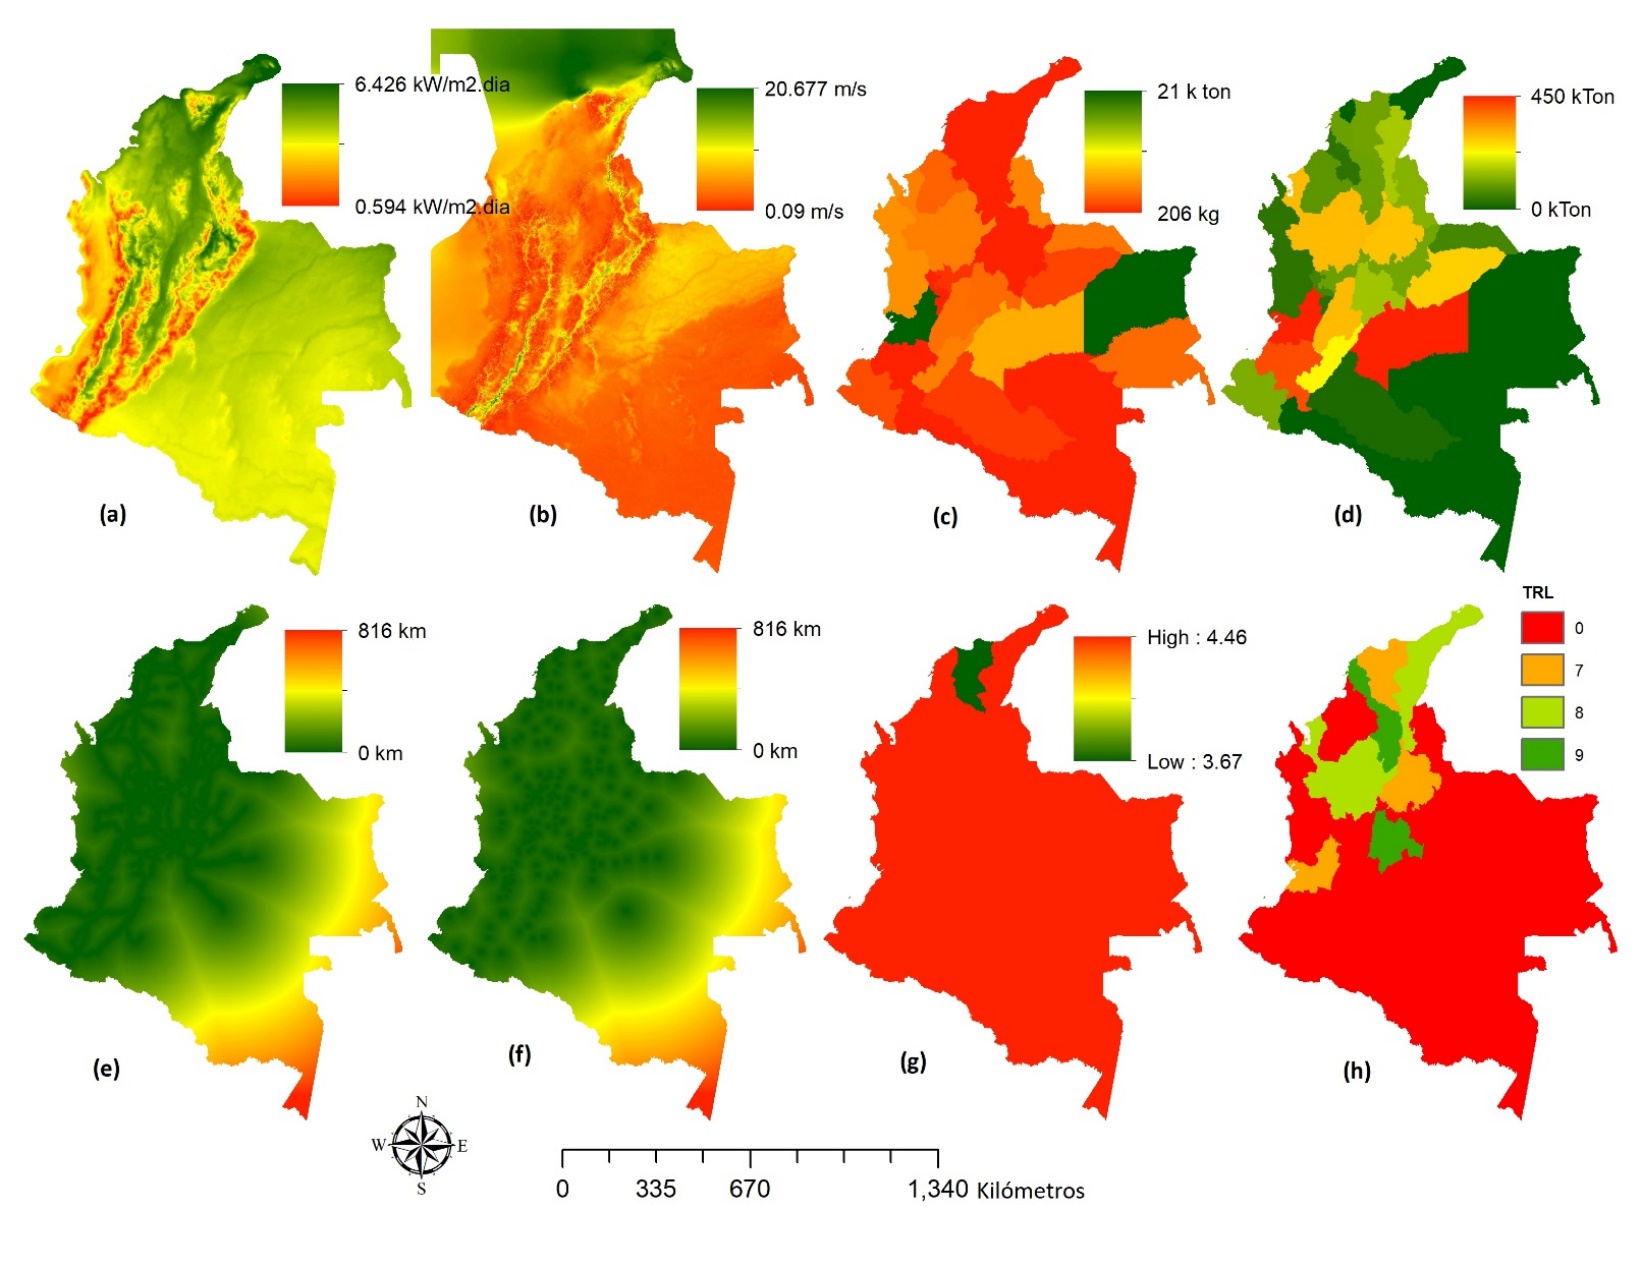


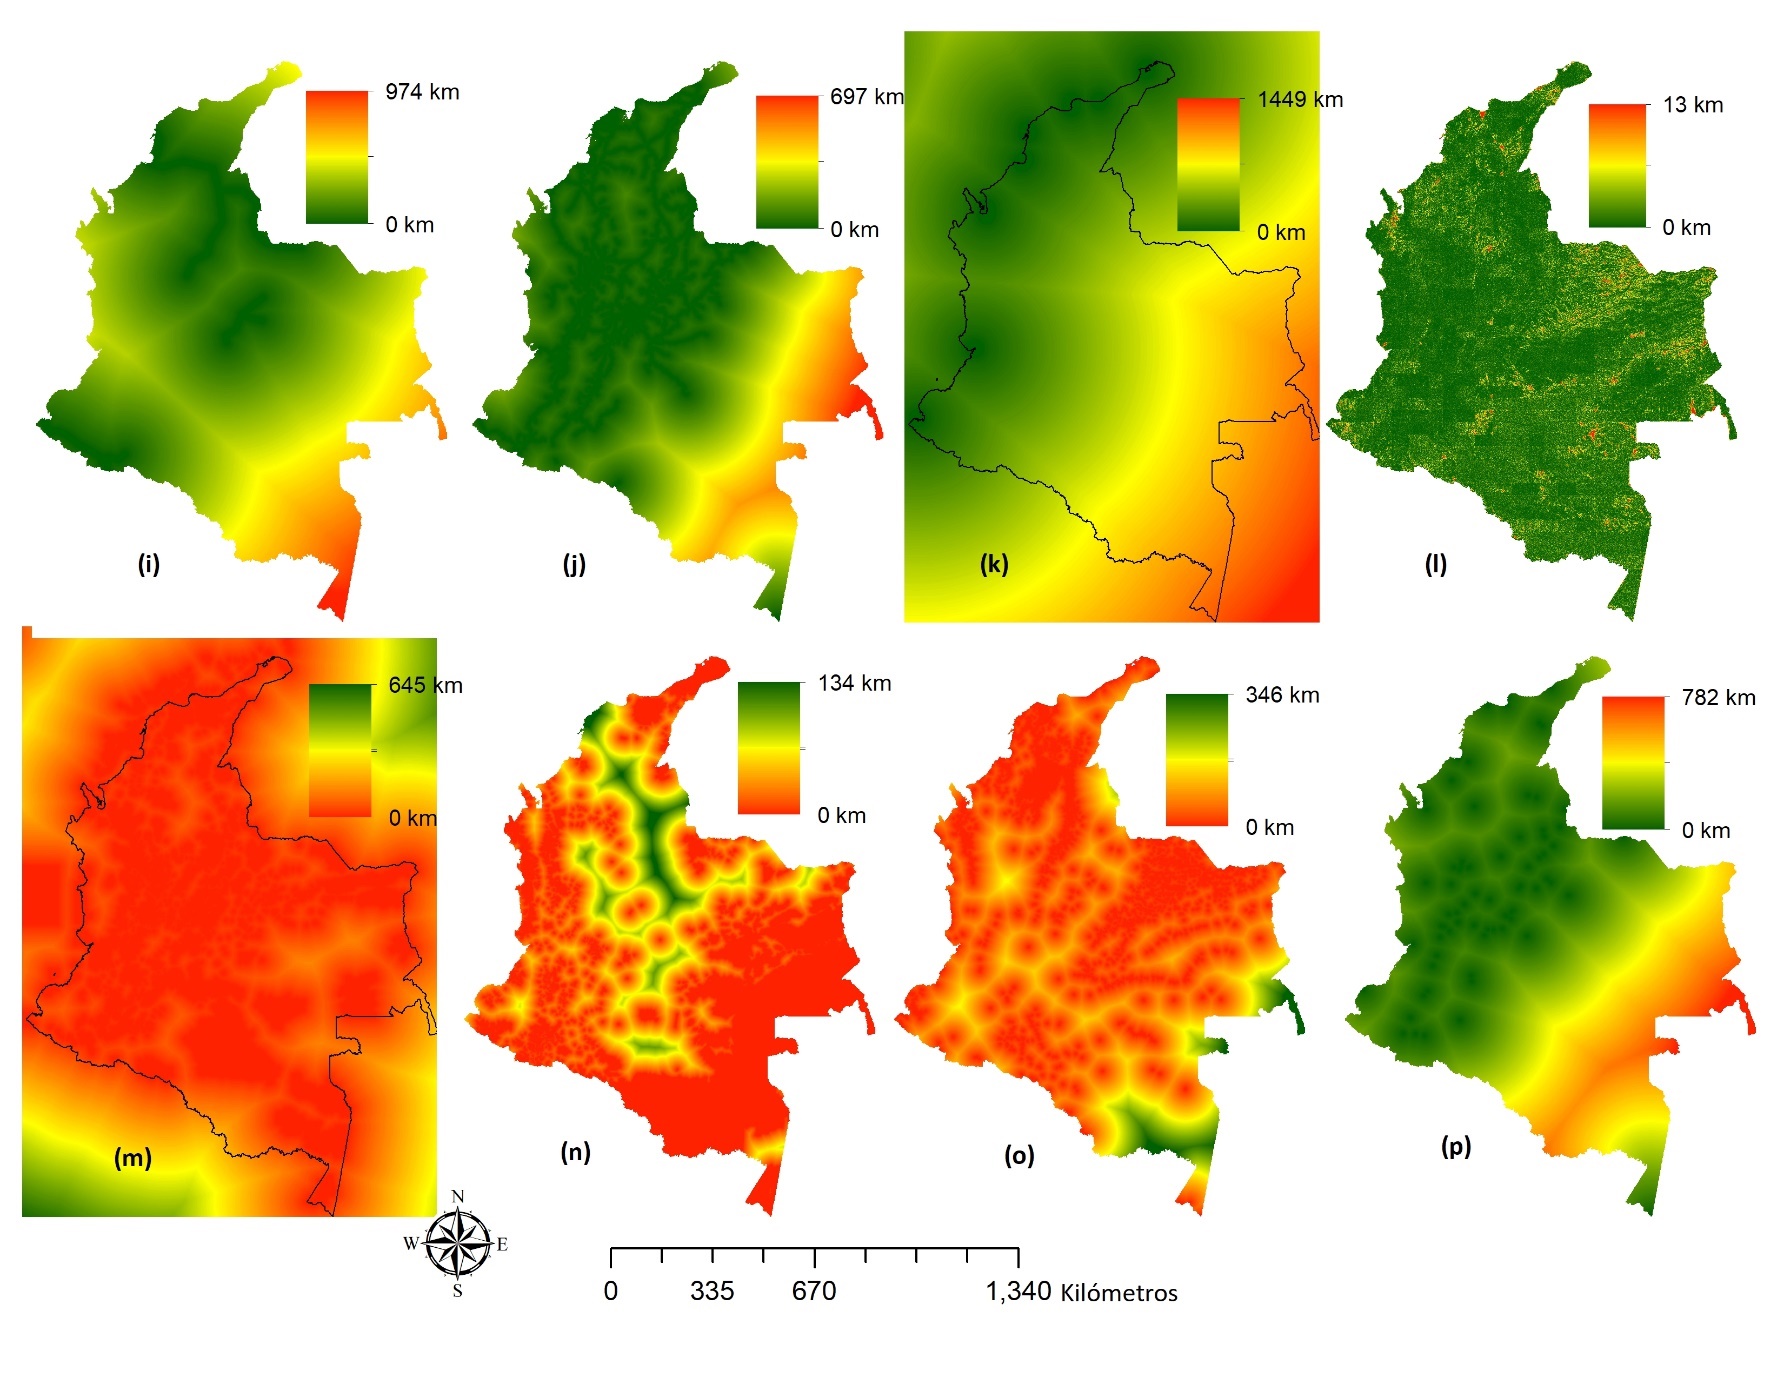


**Figure S1.** Spatial variables considered in the territorial suitability assessment for green hydrogen deployment in Colombia. Panels (a)–(p) correspond to the spatial criteria used in the GIS-MCDA model.

The maps represent the main input layers used in the GIS-MCDA model, including renewable resource potential, electro-renewable hydrogen potential, hydrogen potential from residual biomass, connection infrastructure, levelized cost of hydrogen, technological readiness and performance, proximity to existing infrastructure, freshwater availability and water stress, protected areas, settlements and Indigenous territories, sensitive ecosystems, academic and scientific support, innovation clusters, regulations and incentives, and alignment with public policies.


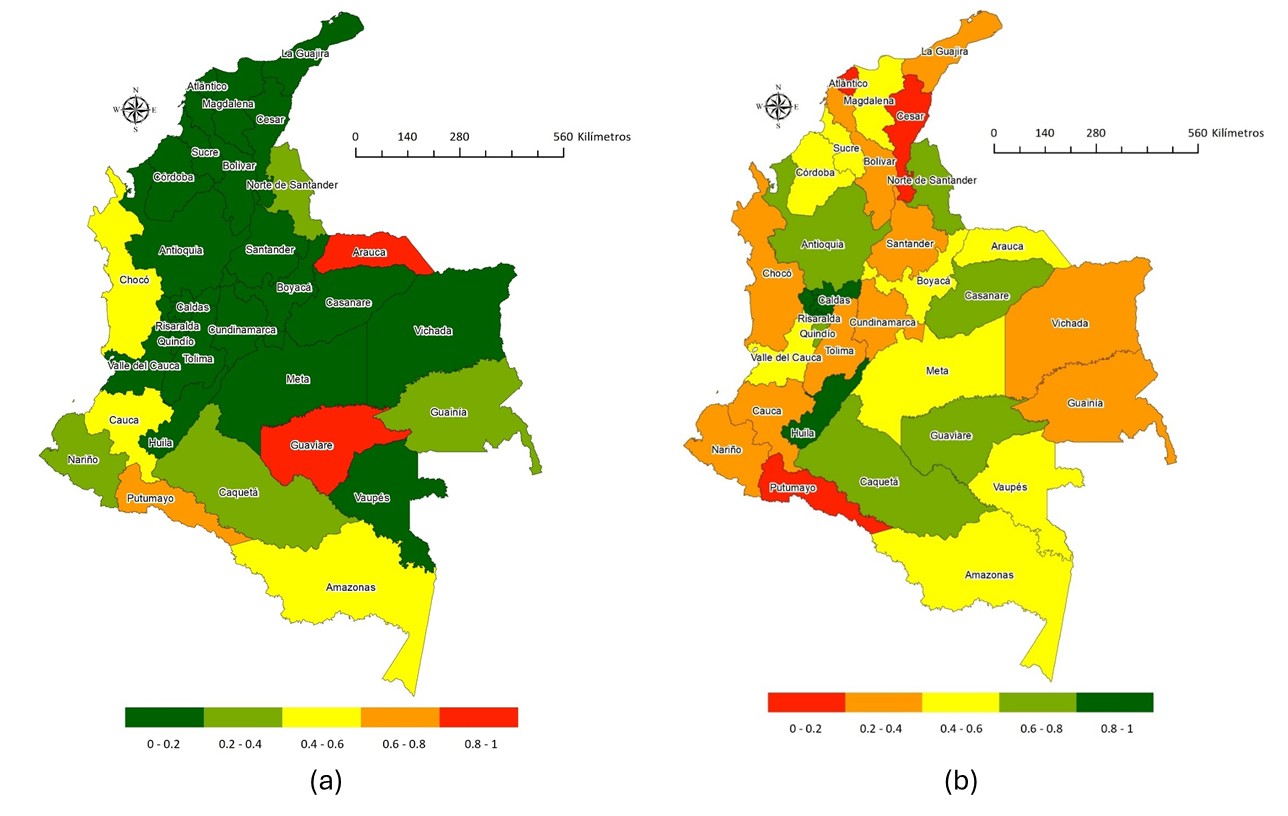


**Figure S2.** Territorial indices used for post-classification interpretation. (a) National Conflict Index, NCI. (b) National Governance Index, NGI. The indices were used as complementary interpretive layers to contextualize departmental prioritization according to conflict intensity and governance conditions.

**Table S3.** Departmental normalized values of the National Conflict Index

| Department | Normalized NCI |
| --- | --- |
| Caldas | 0.023 |
| Caquetá | 0.365 |
| Cundinamarca | 0.000 |
| Huila | 0.102 |
| Meta | 0.107 |
| Quindío | 0.053 |
| Risaralda | 0.055 |
| Santander | 0.016 |
| Tolima | 0.042 |
| Casanare | 0.101 |
| Guaviare | 1.000 |
| Antioquia | 0.077 |
| Boyacá | 0.009 |
| Cauca | 0.561 |
| Cesar | 0.062 |
| Córdoba | 0.065 |
| Chocó | 0.573 |
| La Guajira | 0.099 |
| Magdalena | 0.071 |
| Norte de Santander | 0.249 |
| Sucre | 0.071 |
| Valle del Cauca | 0.085 |
| Arauca | 0.891 |
| Putumayo | 0.618 |
| Amazonas | 0.448 |
| Guainía | 0.265 |
| Vaupés | 0.161 |
| Vichada | 0.145 |
| Nariño | 0.219 |
| Bolívar | 0.059 |
| Atlántico | 0.028 |
| San Andrés, Providencia and Santa Catalina | 0.105 |

**Note:** NCI = National Conflict Index. Higher normalized values indicate higher relative territorial conflict intensity. The index was used only as a post-classification interpretive layer and was not included as a weighted criterion in the GIS-MCDA suitability model.

**Table S4.** Departmental normalized values of the National Governance Index

| Department | Normalized NGI |
| --- | --- |
| Caldas | 0.947 |
| Caquetá | 0.631 |
| Cundinamarca | 0.211 |
| Huila | 0.874 |
| Meta | 0.510 |
| Quindío | 0.724 |
| Risaralda | 1.000 |
| Santander | 0.255 |
| Tolima | 0.285 |
| Casanare | 0.699 |
| Guaviare | 0.621 |
| Antioquia | 0.670 |
| Boyacá | 0.463 |
| Cauca | 0.239 |
| Cesar | 0.118 |
| Córdoba | 0.582 |
| Chocó | 0.248 |
| La Guajira | 0.391 |
| Magdalena | 0.420 |
| Norte de Santander | 0.665 |
| Sucre | 0.432 |
| Valle del Cauca | 0.469 |
| Arauca | 0.506 |
| Putumayo | 0.000 |
| Amazonas | 0.498 |
| Guainía | 0.364 |
| Vaupés | 0.408 |
| Vichada | 0.260 |
| Nariño | 0.380 |
| Bolívar | 0.266 |
| Atlántico | 0.162 |
| San Andrés, Providencia and Santa Catalina | 0.533 |

**Note:** NGI = National Governance Index. Higher normalized values indicate stronger relative governance conditions. The index was used only as a post-classification interpretive layer and was not included as a weighted criterion in the GIS-MCDA suitability model.

**Table S5.** Departmental mean suitability values for green hydrogen deployment

| Rank | Department | Mean suitability |
| --- | --- | --- |
| 1 | Valle del Cauca | 3.538 |
| 2 | Cundinamarca | 3.380 |
| 3 | Antioquia | 3.348 |
| 4 | Santander | 3.305 |
| 5 | Cesar | 3.227 |
| 6 | Bolívar | 3.160 |
| 7 | Norte de Santander | 3.083 |
| 8 | Tolima | 3.066 |
| 9 | Atlántico | 3.054 |
| 10 | Magdalena | 3.021 |
| 11 | Caldas | 2.987 |
| 12 | Huila | 2.942 |
| 13 | La Guajira | 2.934 |
| 14 | Meta | 2.921 |
| 15 | Boyacá | 2.868 |
| 16 | Cauca | 2.846 |
| 17 | Sucre | 2.829 |
| 18 | Córdoba | 2.781 |
| 19 | Casanare | 2.765 |
| 20 | Quindío | 2.762 |
| 21 | Nariño | 2.761 |
| 22 | Risaralda | 2.723 |
| 23 | Arauca | 2.628 |
| 24 | Chocó | 2.556 |
| 25 | Vichada | 2.534 |
| 26 | Caquetá | 2.399 |
| 27 | Putumayo | 2.364 |
| 28 | Guaviare | 2.168 |
| 29 | Guainía | 2.164 |
| 30 | Vaupés | 2.137 |
| 31 | Amazonas | 2.124 |
| 32 | San Andrés, Providencia and Santa Catalina | N/A |

**Note:** Mean suitability values were obtained by averaging the final GIS-MCDA suitability surface within each departmental boundary. San Andrés, Providencia and Santa Catalina is reported as N/A because no valid raster cells were available for this insular territory in the final processed suitability surface.
